# Supplementary material for: Stabilization of Li7La3Zr2O12 Solid Electrolyte through Ga‐Based Precipitates and the Ga–Au Surface Layer
Source: Hindawi journal article supplement (doi:10.1155/2024/9050890), 2024-01-01
Supplement: f1 [file 9050890.f1.docx]

| **Excess Li (x)** | **Stoichiometry (Li7x-0.966Al0.172Ga0.144La3Zr1.982Ta0.018O12)** |
| --- | --- |
| 1.0 | Li6.034Al0.172Ga0.144La3Zr1.982Ta0.018O12 |
| 1.03 | Li6.25Al0.172Ga0.144La3Zr1.982Ta0.018O12 |
| 1.1 | Li6.734Al0.172Ga0.144La3Zr1.982Ta0.018O12 |
| 1.13 | Li6.95Al0.172Ga0.144La3Zr1.982Ta0.018O12 |
| 1.16 | Li7.154Al0.172Ga0.144La3Zr1.982Ta0.018O12 |
| 1.2 | Li7.434Al0.172Ga0.144La3Zr1.982Ta0.018O12 |

**Table S1.** Stoichiometry of Li7x-0.966Al0.172Ga0.144La3Zr1.982Ta0.018O12 (x = 1.0, 1.03, 1.1, 1.13, 1.16) with varying excess Li concentrations.


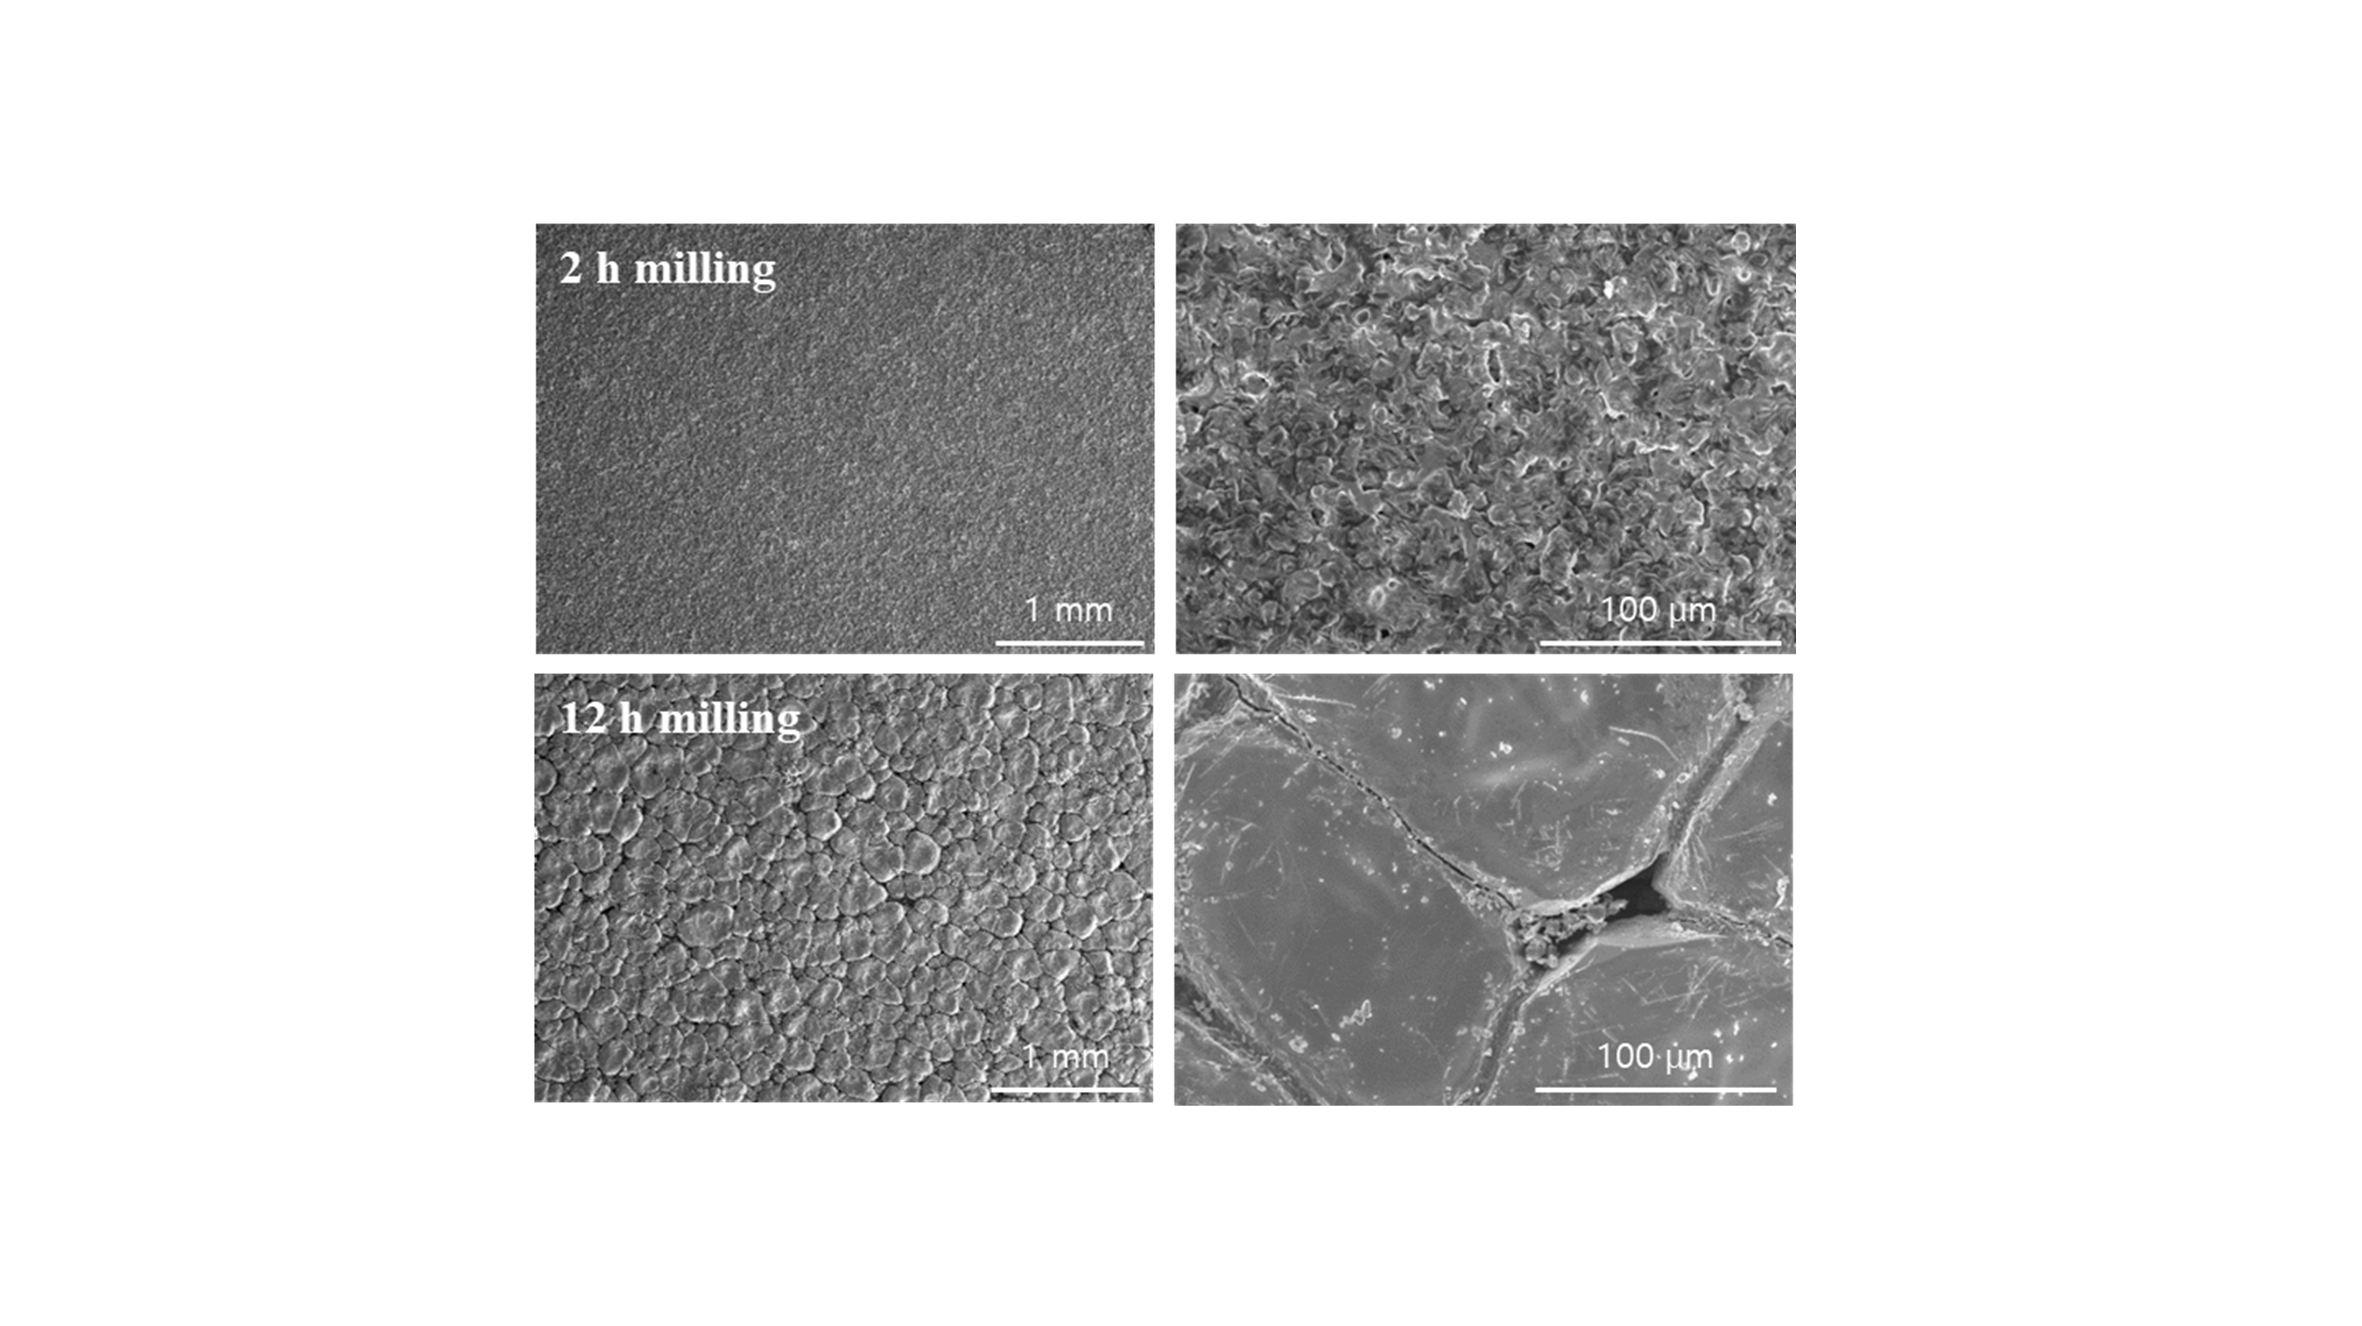


**Figure. S1** Top-view SEM images of Li7La3Zr2O12 solid electrolytes with the powder milling duration of 2 and 12 hours; the Li7La3Zr2O12 pellets were polished to achieve a smooth surface.


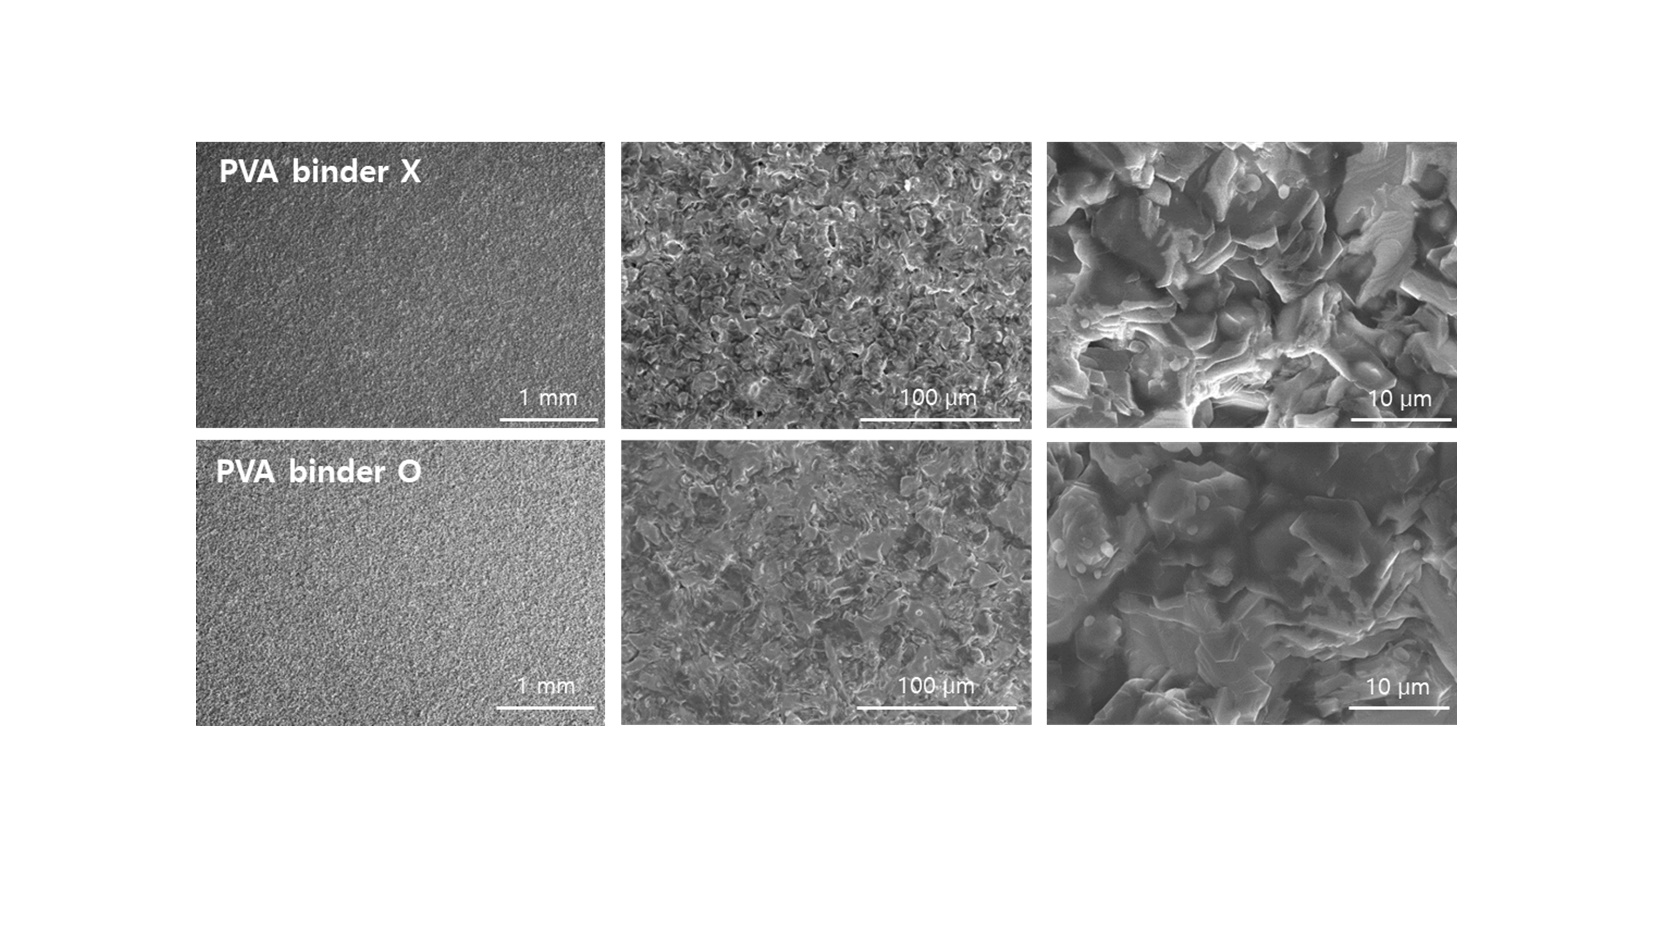


**Figure. S2** Top-view SEM images of Li7La3Zr2O12 solid electrolytes with and without PVA binder; the Li7La3Zr2O12 pellets were polished to achieve a smooth surface.


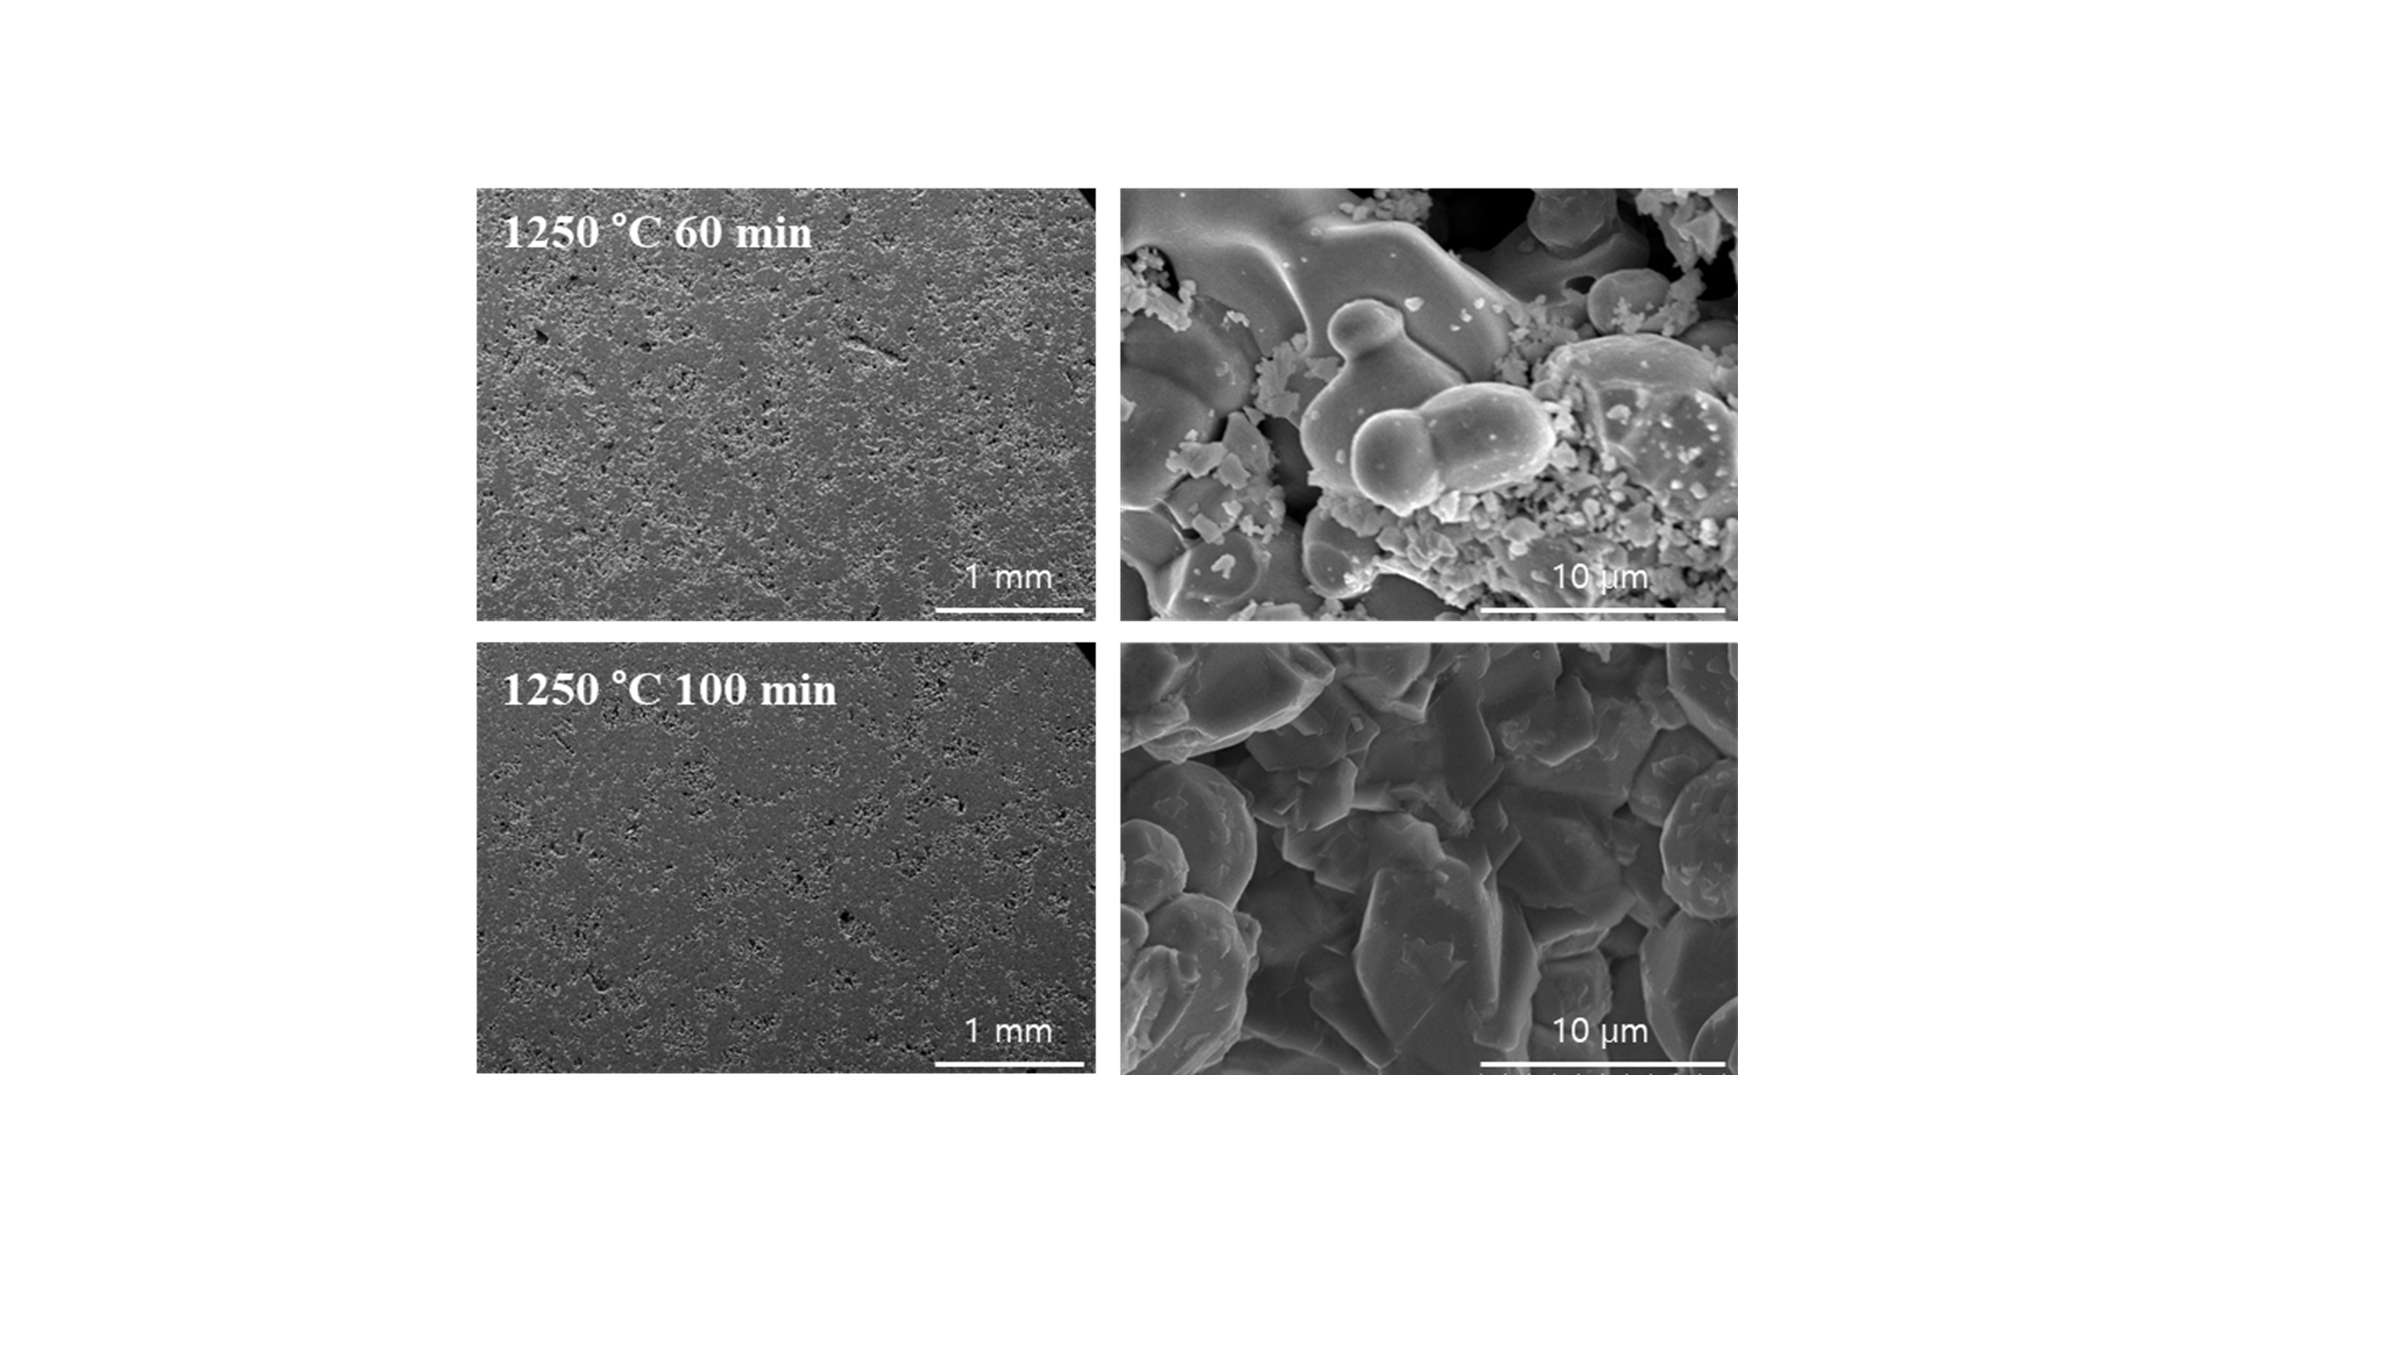


**Figure. S3** Top-view SEM images of Li7La3Zr2O12 electrolytes with different sintering time 60, and 100 min; the Li7La3Zr2O12 pellets were polished to achieve a smooth surface.


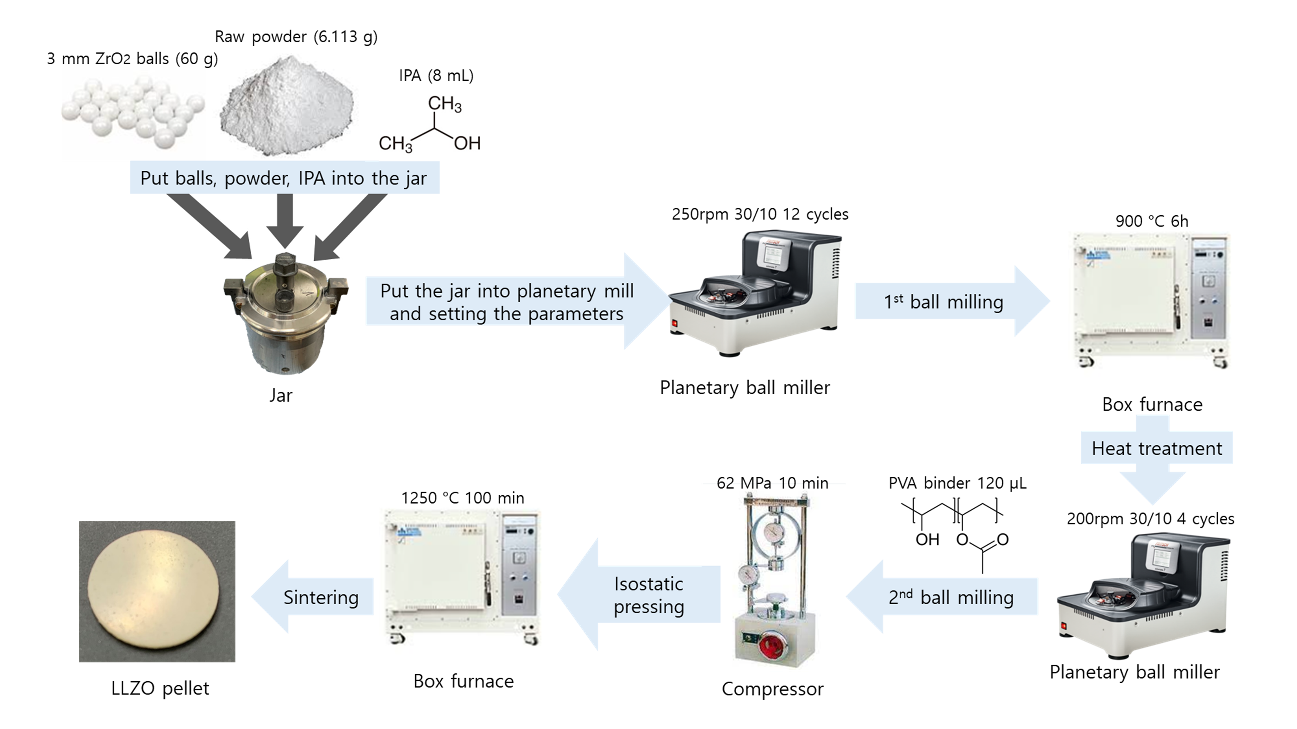


**Figure. S4** Fabrication of Li7La3Zr2O12 electrolyte pellets using the top–down approach.


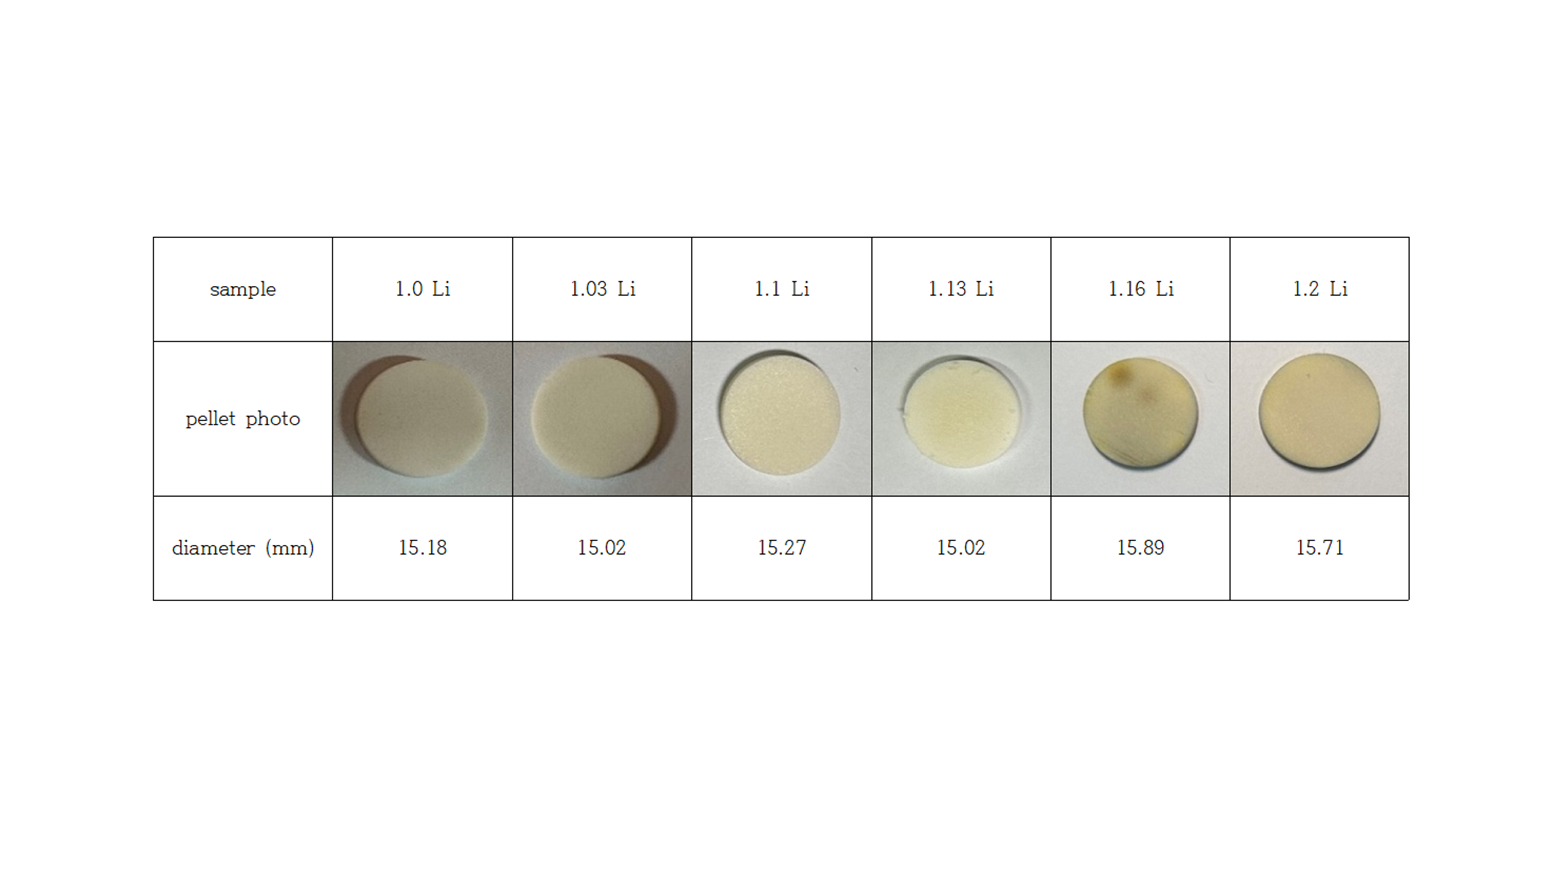


**Figure. S5** Photographs and diameters of sintered Li7La3Zr2O12 pellets with excess Li concentrations ranging from 1.0 to 1.2.





**Figure. S6** Raman patterns of Li7La3Zr2O12 pellet with an excess Li concentration of 1.16 and a dwell time of 2000 ms.

**
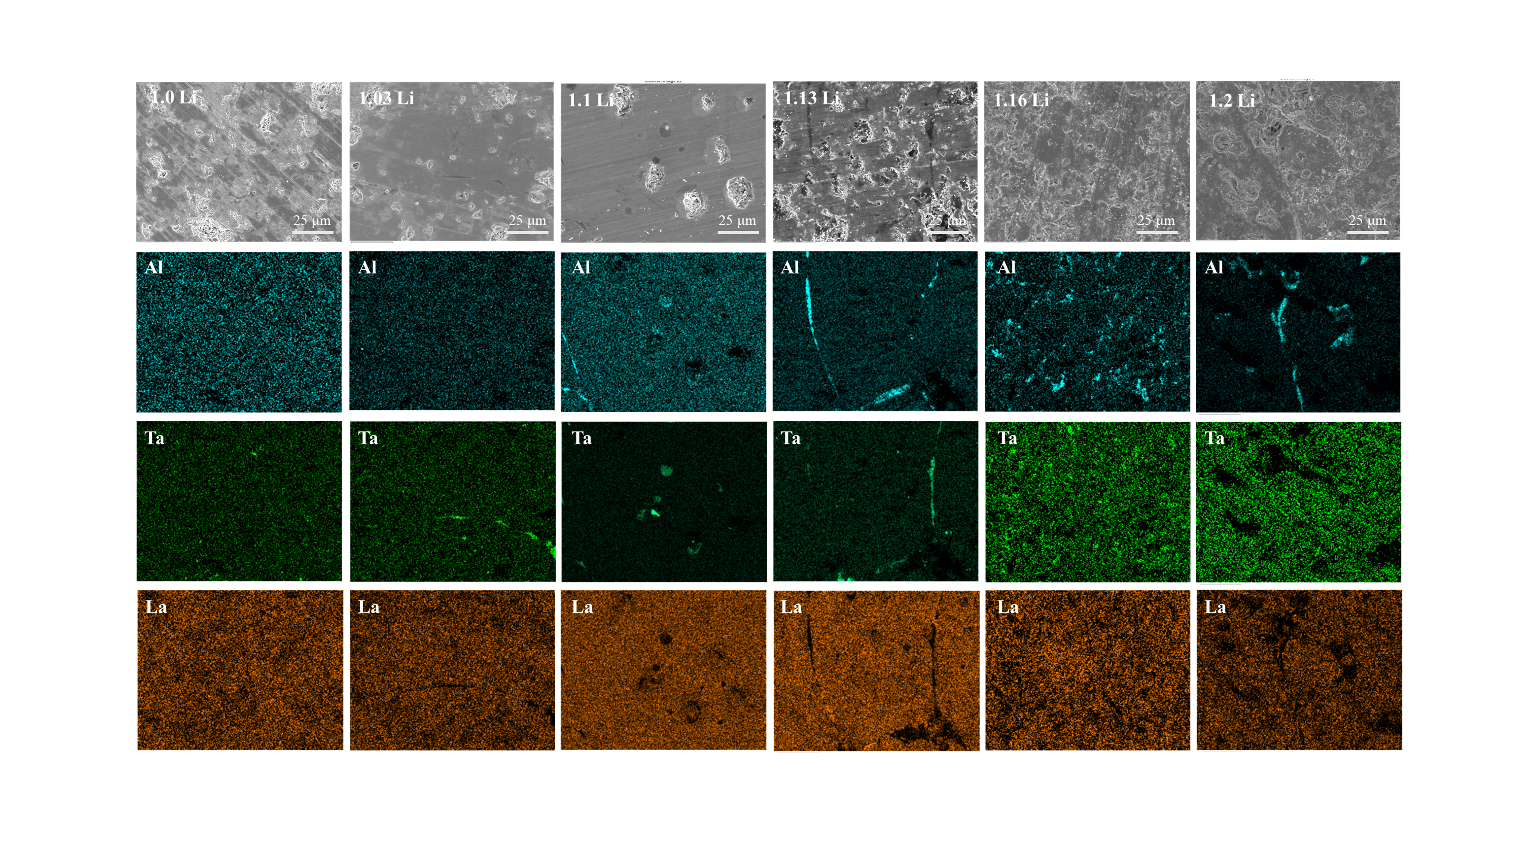
**

**Figure. S7** EDS mapping of Al, Ta, La based on the top-view of Li7La3Zr2O12 pellets with excess Li contents of 1.0, 1.03, 1.1, 1.13, 1.16, 1.2. The scale bar indicates 25 μm.

| **Excess Li** | **Rbulk (Ω)** | **RGB (Ω)** | **Impedance (Ω)** | **L (cm)** | **S (cm2)** | **σ (mS cm−1)** |
| --- | --- | --- | --- | --- | --- | --- |
| 1.0 | 66.97 | 587.7 | 654.67 | 0.14 | 0.785 | 0.272 |
| 1.03 | 85.77 | 607.1 | 692.87 | 0.14 | 0.785 | 0.257 |
| 1.1 | 146.5 | 305.2 | 451.7 | 0.135 | 0.785 | 0.308 |
| 1.13 | 114.9 | 318.9 | 433.8 | 0.142 | 0.785 | 0.417 |
| 1.16 | 206.3 | 104 | 310.3 | 0.147 | 0.785 | 0.604 |
| 1.2 | 233.3 | 396.6 | 629.9 | 0.138 | 0.785 | 0.279 |

**Table S2.** Fitted parameters corresponding to the Nyquist plots and thickness and area of sintered Li7La3Zr2O12 pellets with excess Li concentrations ranging from 1.0 to 1.2.


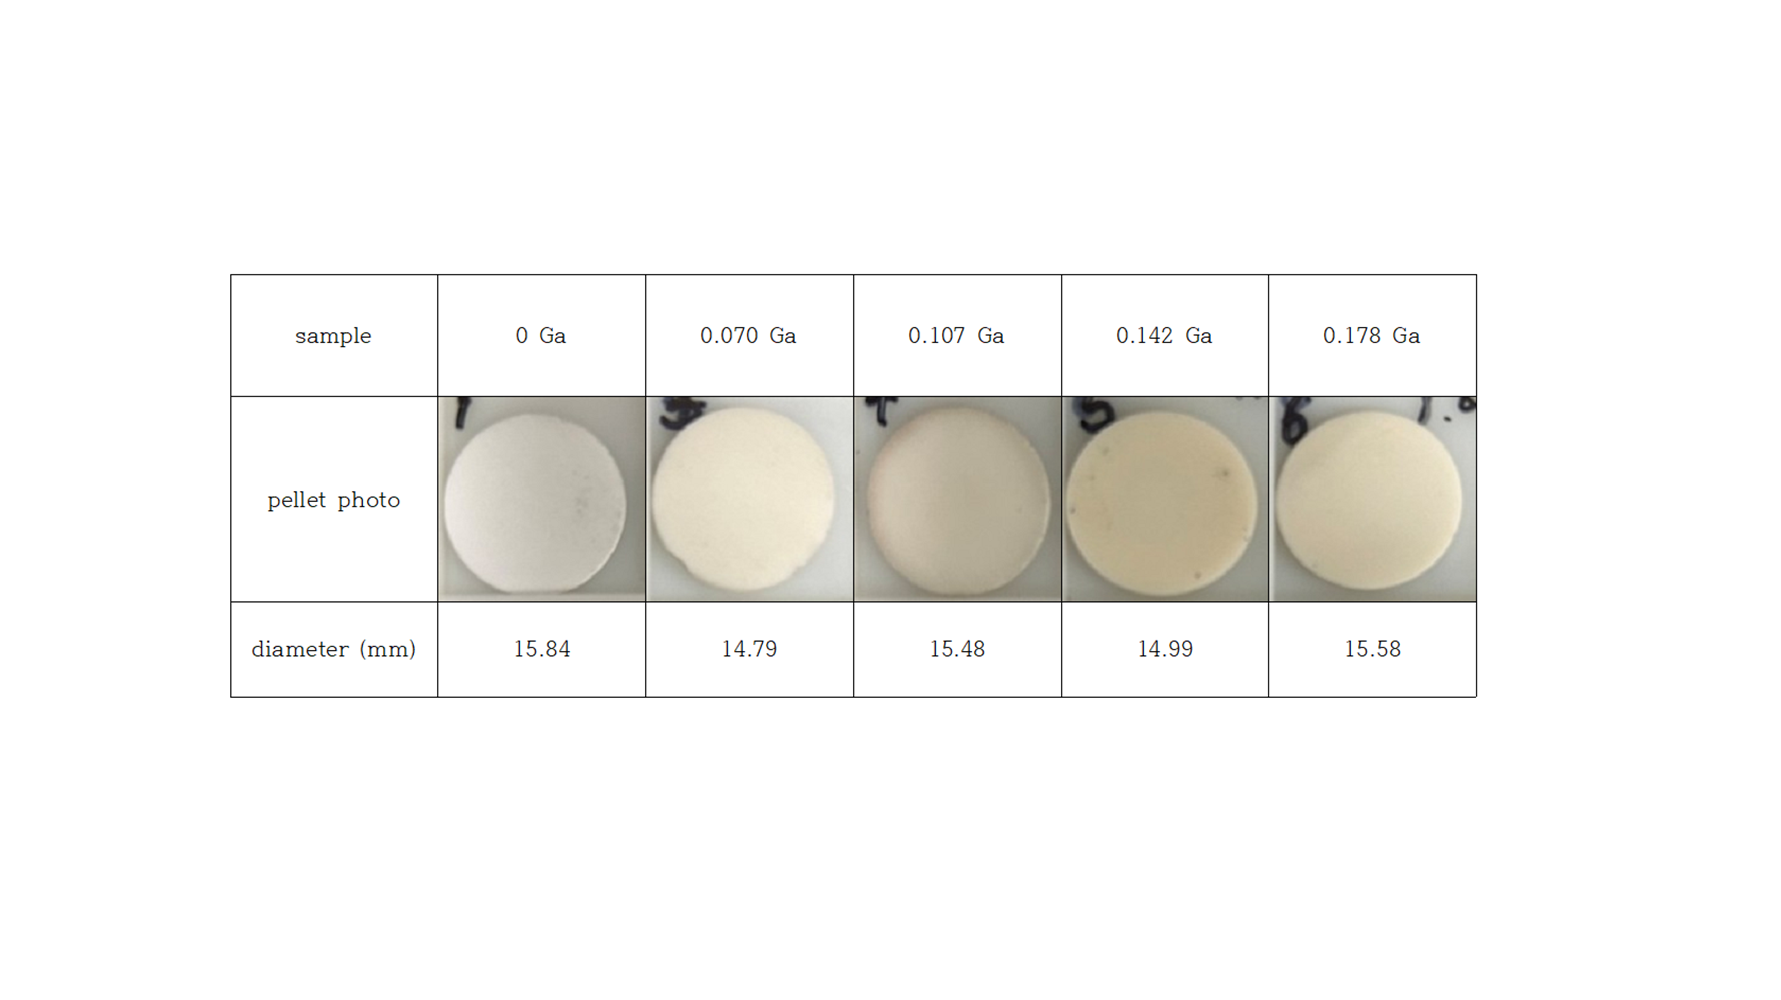


**Figure. S8** Photographs and diameters of sintered Li7La3Zr2O12 pellets with Ga dopant concentrations ranging from 0 to 0.178.

**Table S3.** Relative density of sintered LLZO pellets with Ga dopant contents ranging from 0 to 0.178. (using Archimedes' method)

| **Ga dopant content** | **Weight of pellet in air (g)** | **Weight of pellet in water (g)** | **Weight of dried pellet (g)** | **Density of water**  **(g cm−3)** | **Theoretical density of cubic LLZO (g cm−3)** | **Relative density (%)** |
| --- | --- | --- | --- | --- | --- | --- |
| 0 | 0.588 | 0.458 | 0.579 | 1.000 | 5.098 | 87.36 |
| 0.070 | 0.987 | 0.787 | 0.985 | 1.000 | 5.098 | 96.61 |
| 0.107 | 0.956 | 0.758 | 0.955 | 1.000 | 5.098 | 94.61 |
| 0.142 | 0.972 | 0.770 | 0.970 | 1.000 | 5.098 | 94.19 |
| 0.178 | 0.842 | 0.663 | 0.838 | 1.000 | 5.098 | 91.83 |

**Table S4.** Fitted parameters corresponding to the Nyquist plots and thickness and area of sintered Li7La3Zr2O12 pellets with Ga dopant concentrations ranging from 0 to 0.178.

| **Ga dopant content** | **Rbulk (Ω)** | **RGB (Ω)** | **Impedance (Ω)** | **L (cm)** | **S (cm2)** | **σ (mS cm−1)** |
| --- | --- | --- | --- | --- | --- | --- |
| 0 | 11.32 | 6458.88 | 6470.2 | 0.111 | 0.785 | 0.219 |
| 0.070 | 265.2 | 563.4 | 828.6 | 0.176 | 0.785 | 0.271 |
| 0.107 | 176.4 | 246.5 | 422.9 | 0.150 | 0.785 | 0.452 |
| 0.142 | 163.33 | 111.1 | 274.43 | 0.170 | 0.785 | 0.789 |
| 0.178 | 161.4 | 168.8 | 330.2 | 0.162 | 0.785 | 0.625 |

**
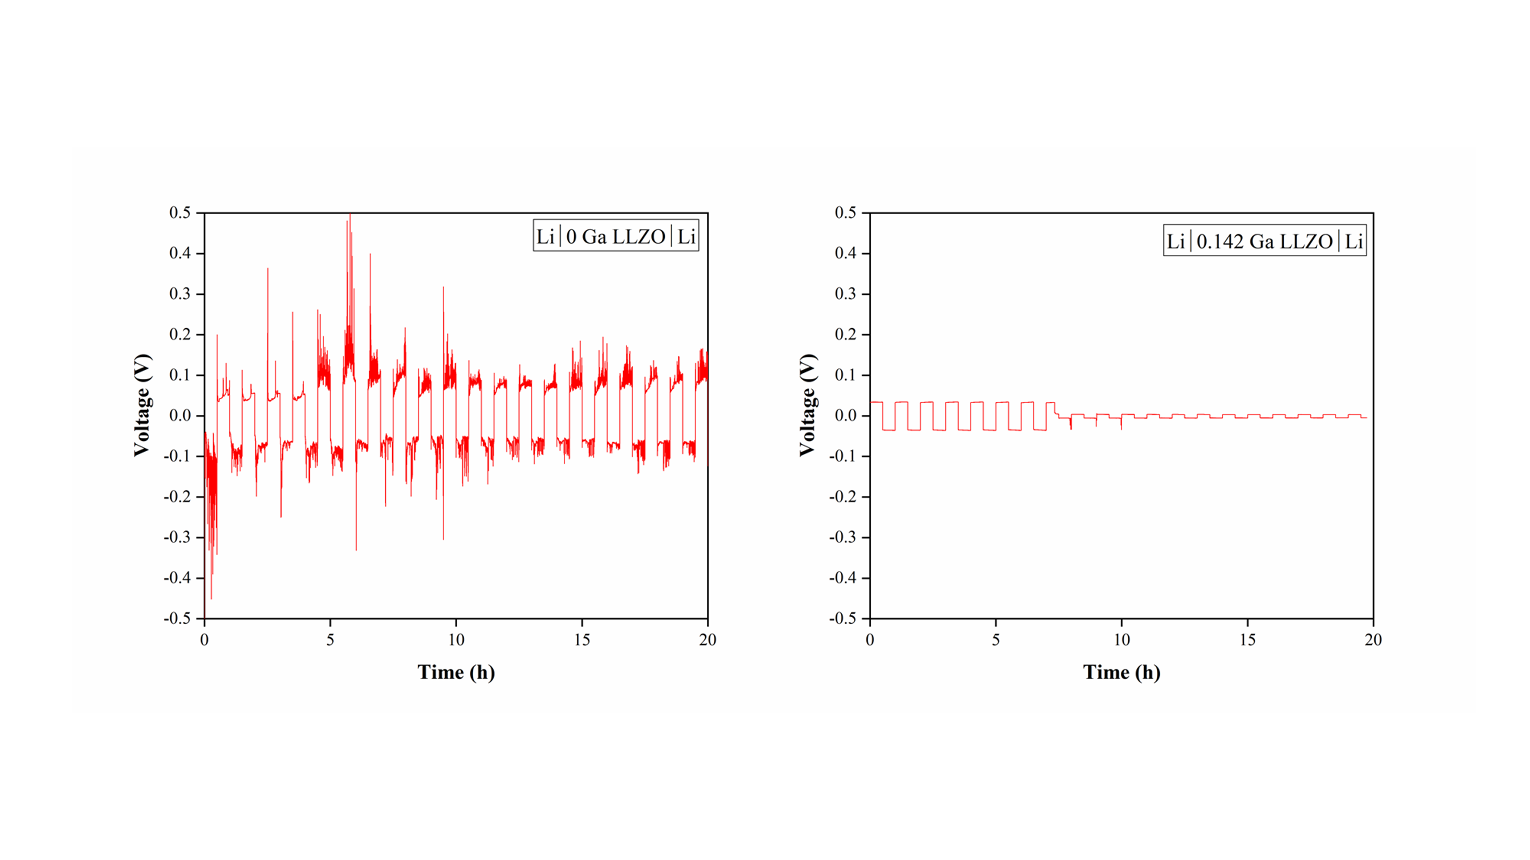
**

**Figure. S9** Galvanostatic cycling performance of Li | LLZO | Li symmetric cells without and with Ga doping at a current density of 0.1 mA cm−2 at room temperature.

**
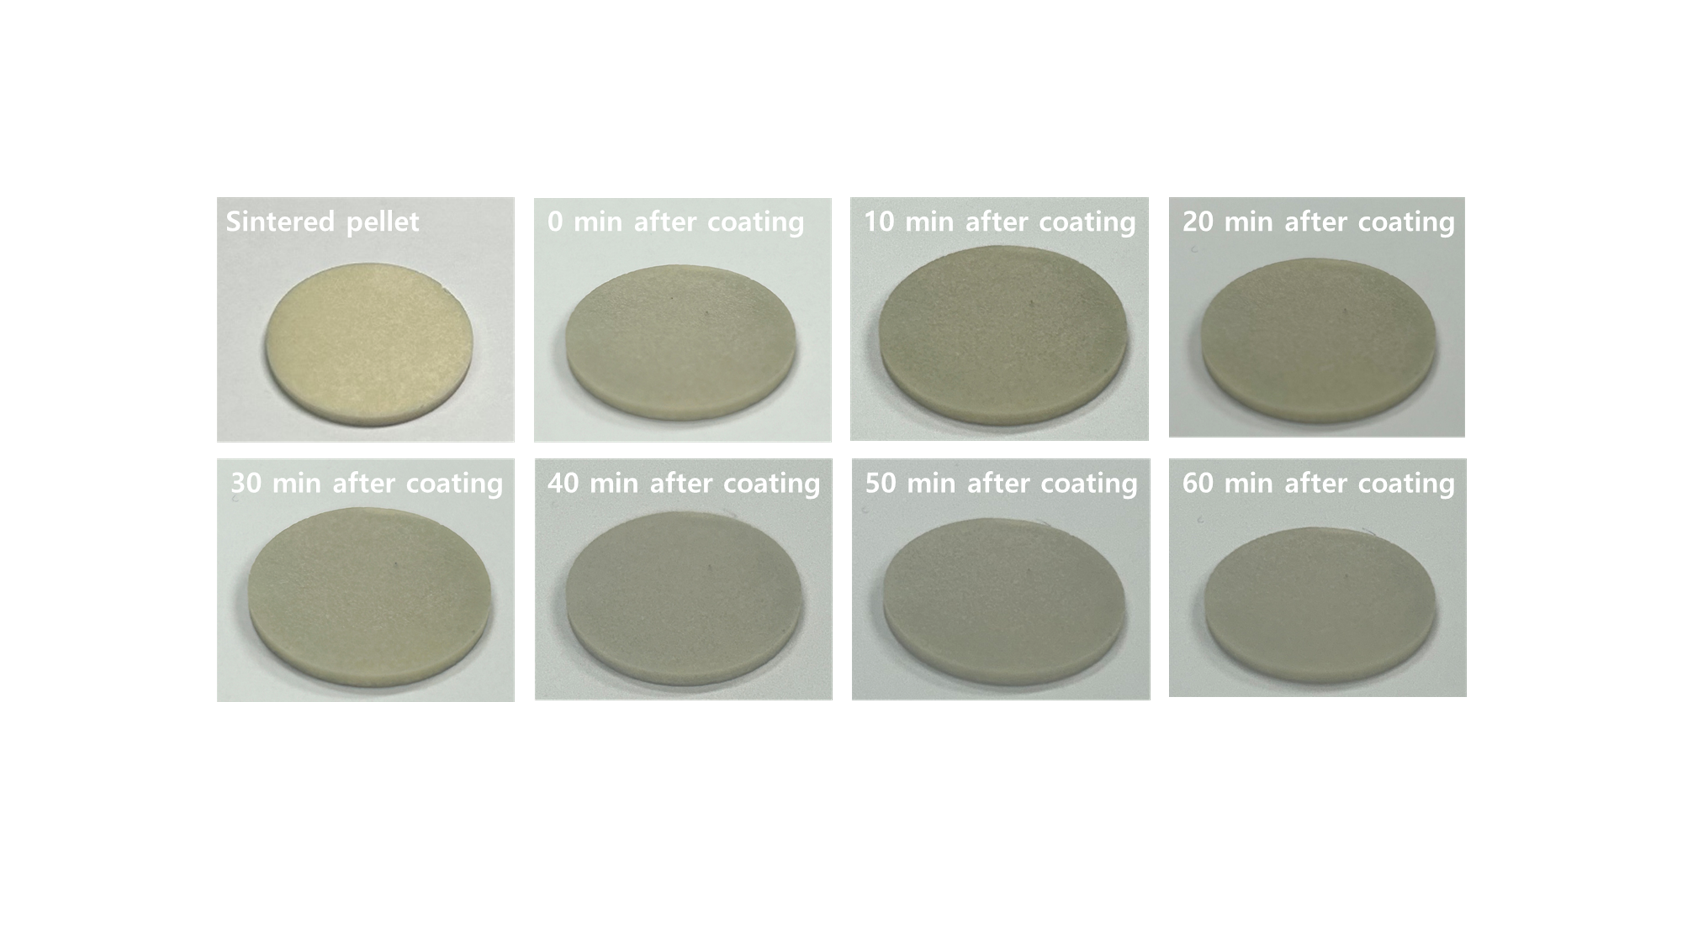
**

**Figure. S10** Photo of a smooth surface of Ga-doped (0.142) Li7La3Zr2O12 electrolyte with Au coating for 20 s, taken at 10 min intervals.


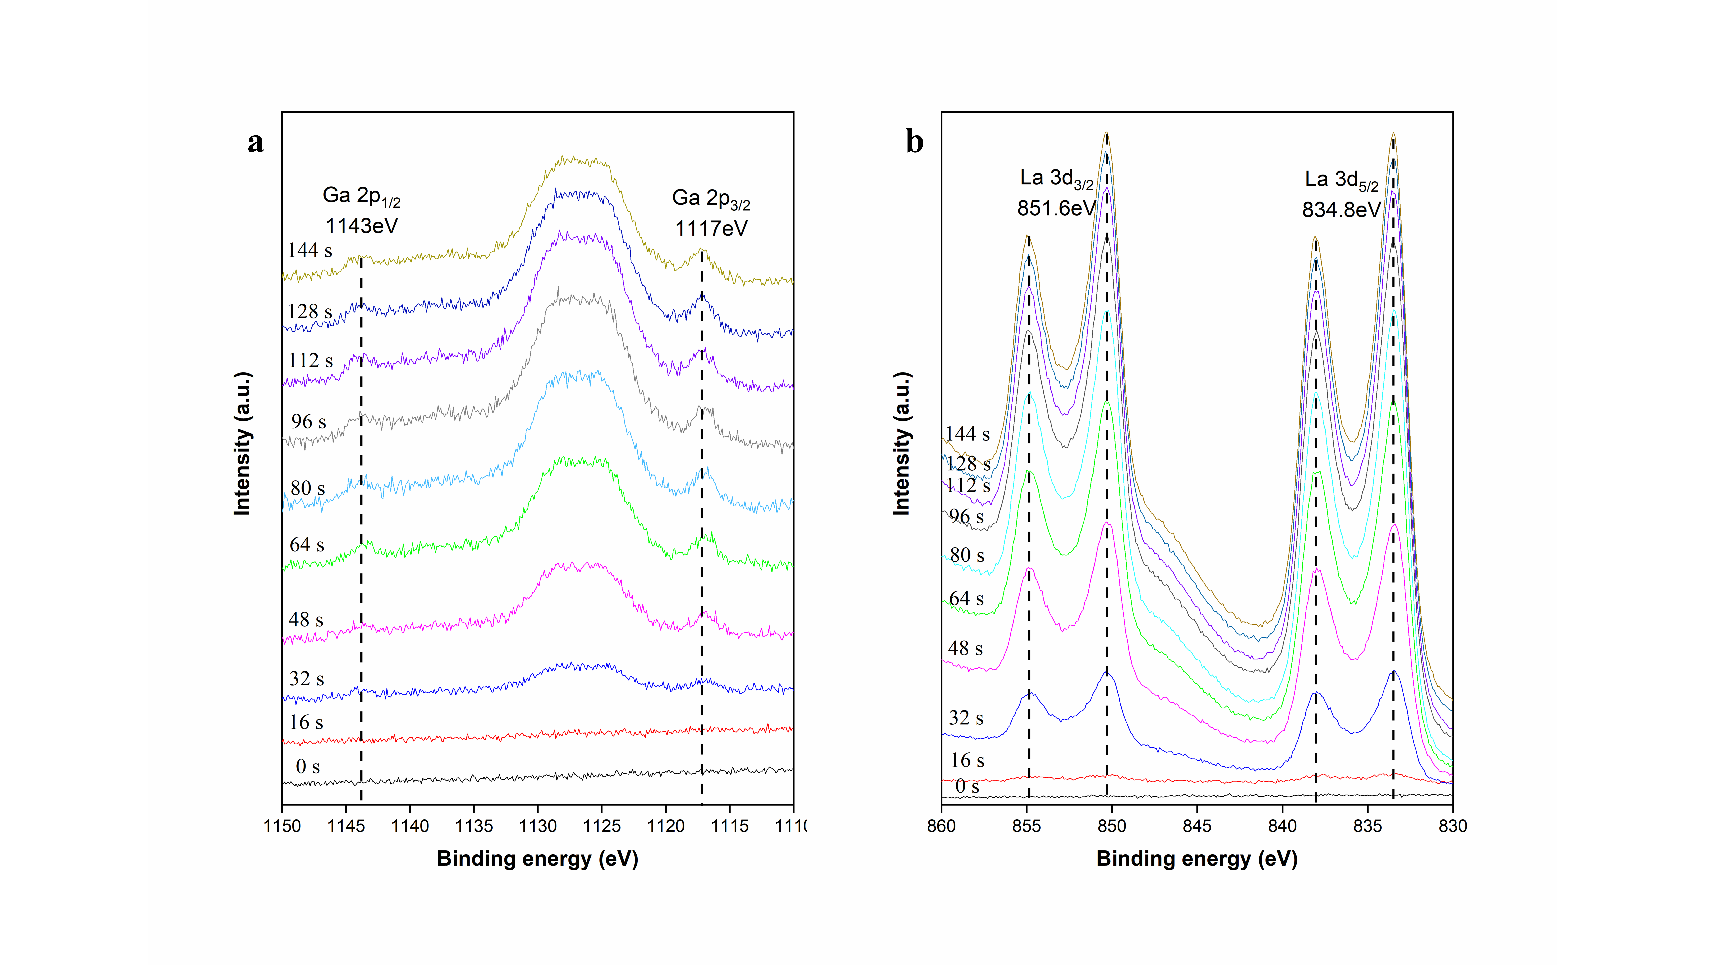


**Figure. S11** XPS spectrum of Au-coated Ga-0.142-LLZO for 20 seconds. XPS spectra showing the etching time results for (a) Ga 2p and (b) La 3d of Au-coated Ga-0.142-LLZO.


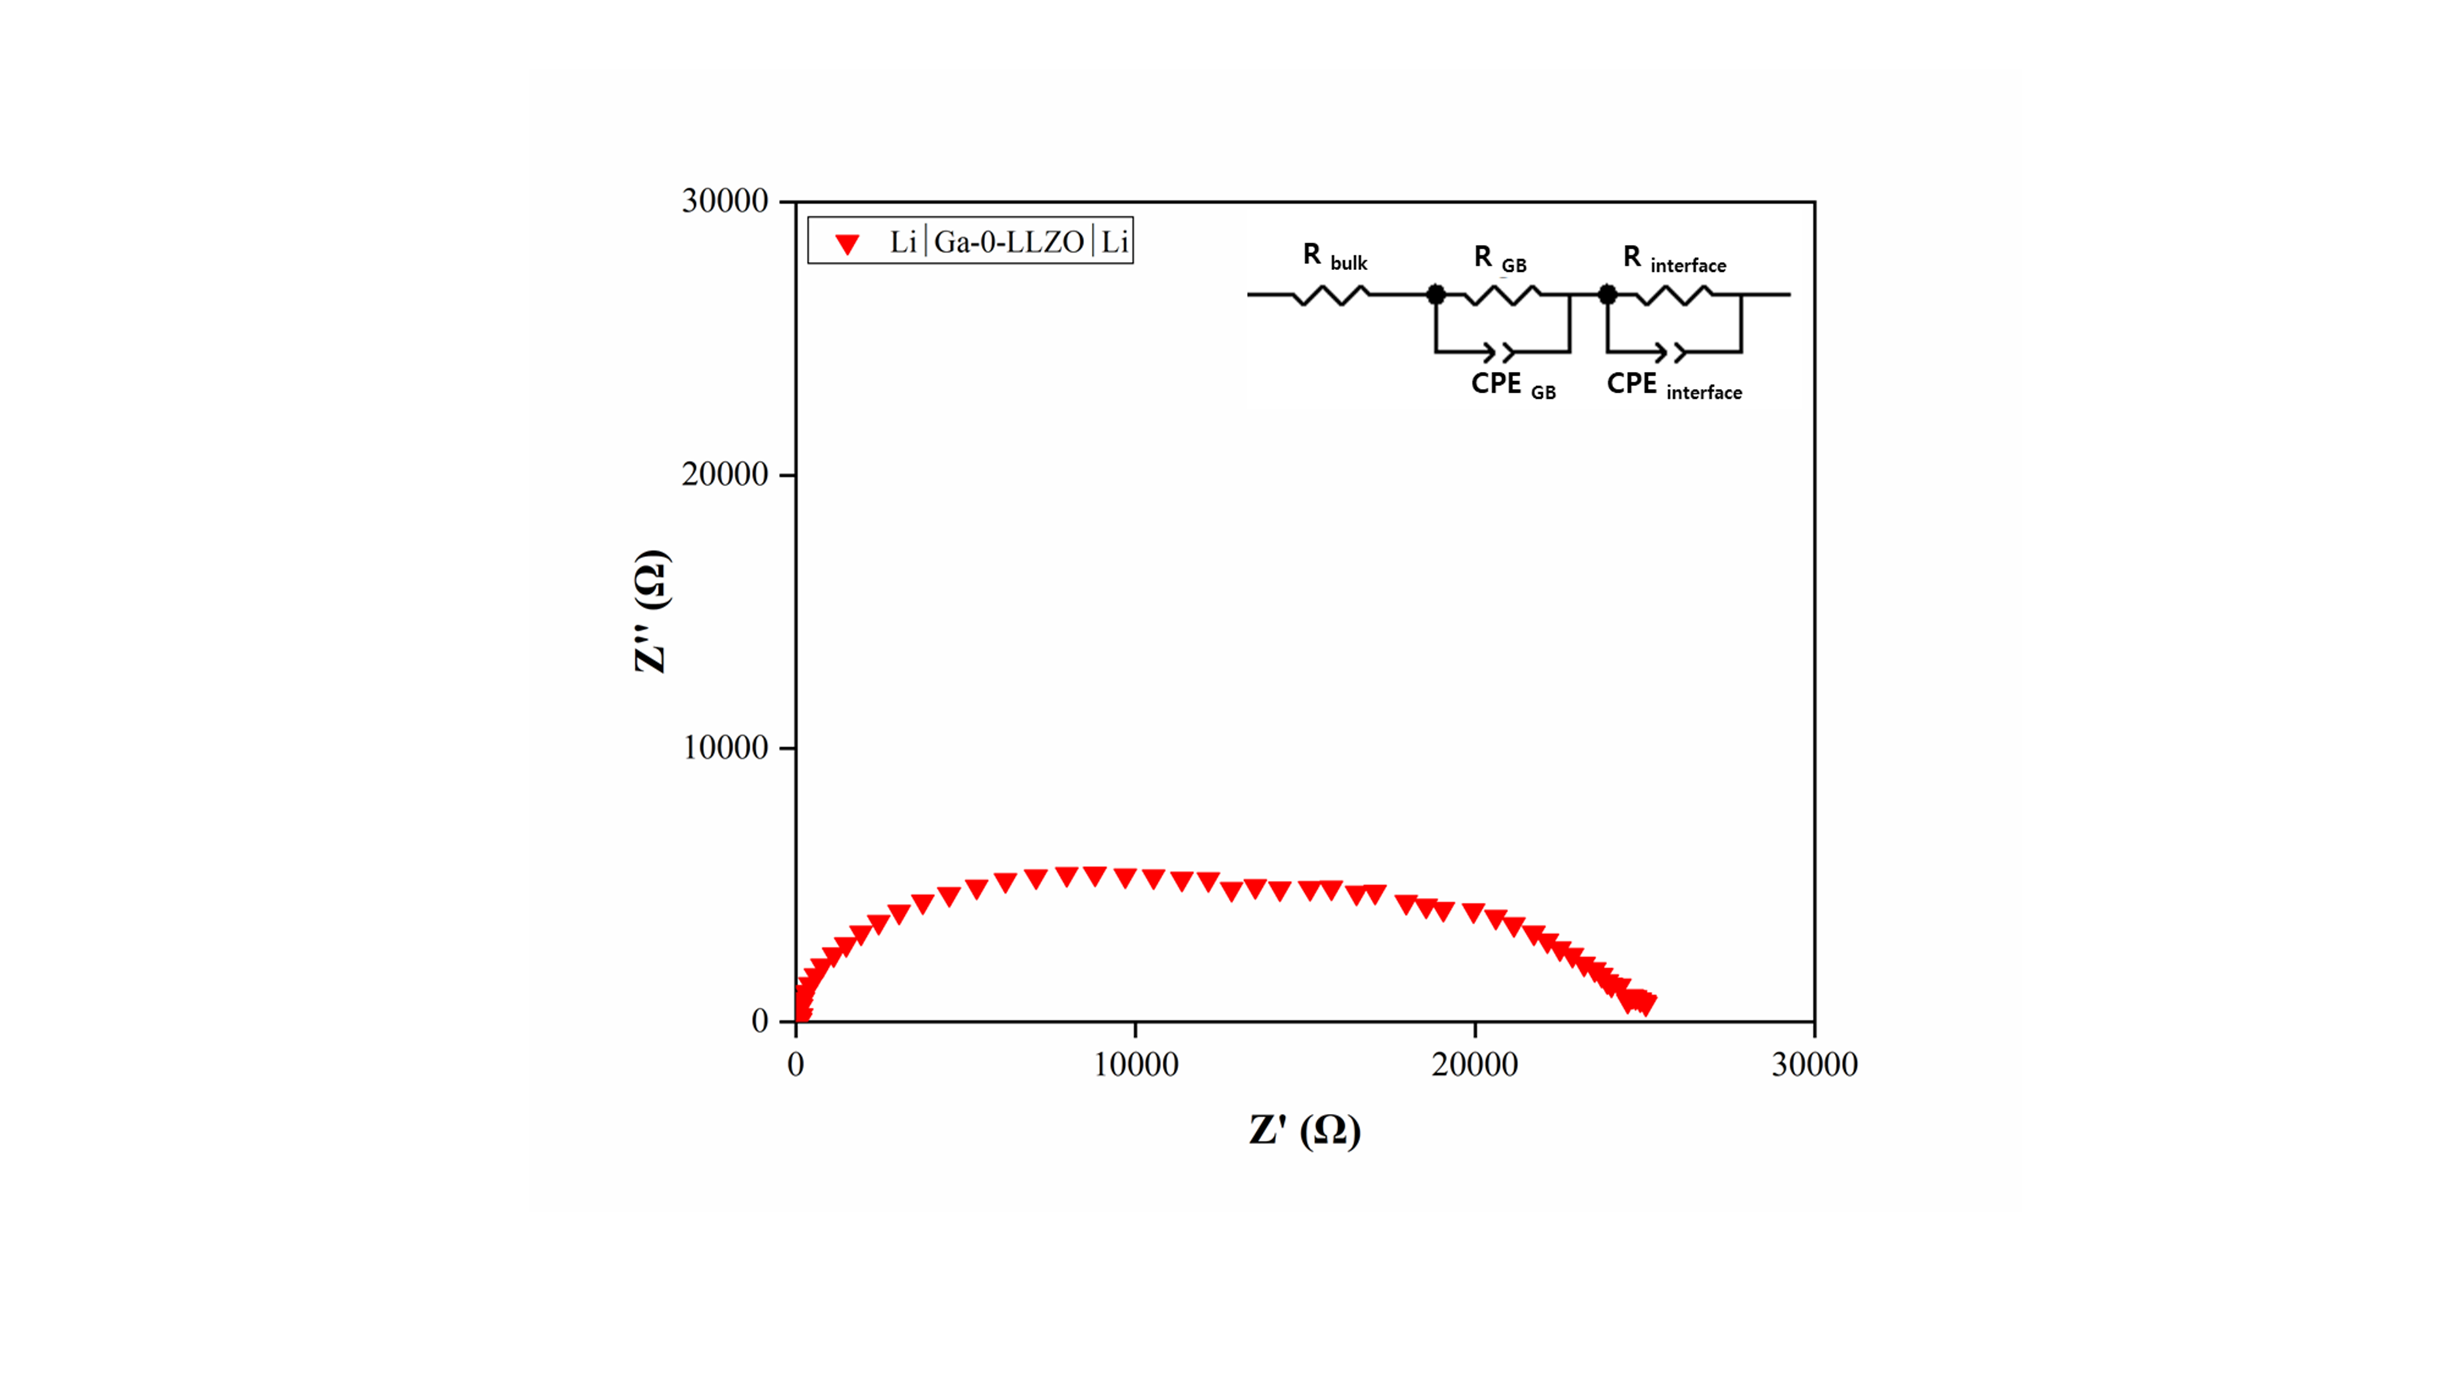


**Figure. S12** Nyquist plot of Li | Ga-0-LLZO | Li symmetric cell without Ga dopingLi7La3Zr2O12 pellet.

**Table S5.** Fitted parameters corresponding to the Nyquist plots for different configurations: Li | Ga-0-LLZO | Li, Li | Au | Ga-0-LLZO | Au | Li, Li | Au | Ga-0.142-LLZO | Au | Li.

| **Symmetric cell** | **Rbulk (Ω)** | **RGB (Ω)** | **R interface (Ω)** |
| --- | --- | --- | --- |
| Li | Ga-0-LLZO | Li | 212.4 | 9788 | 12530 |
| Li | Au | Ga-0-LLZO | Au | Li | 169.2 | 3591 | 1227 |
| Li | Au | Ga-0.142-LLZO | Au | Li | 158.2 | 195.4 | 68.01 |

**
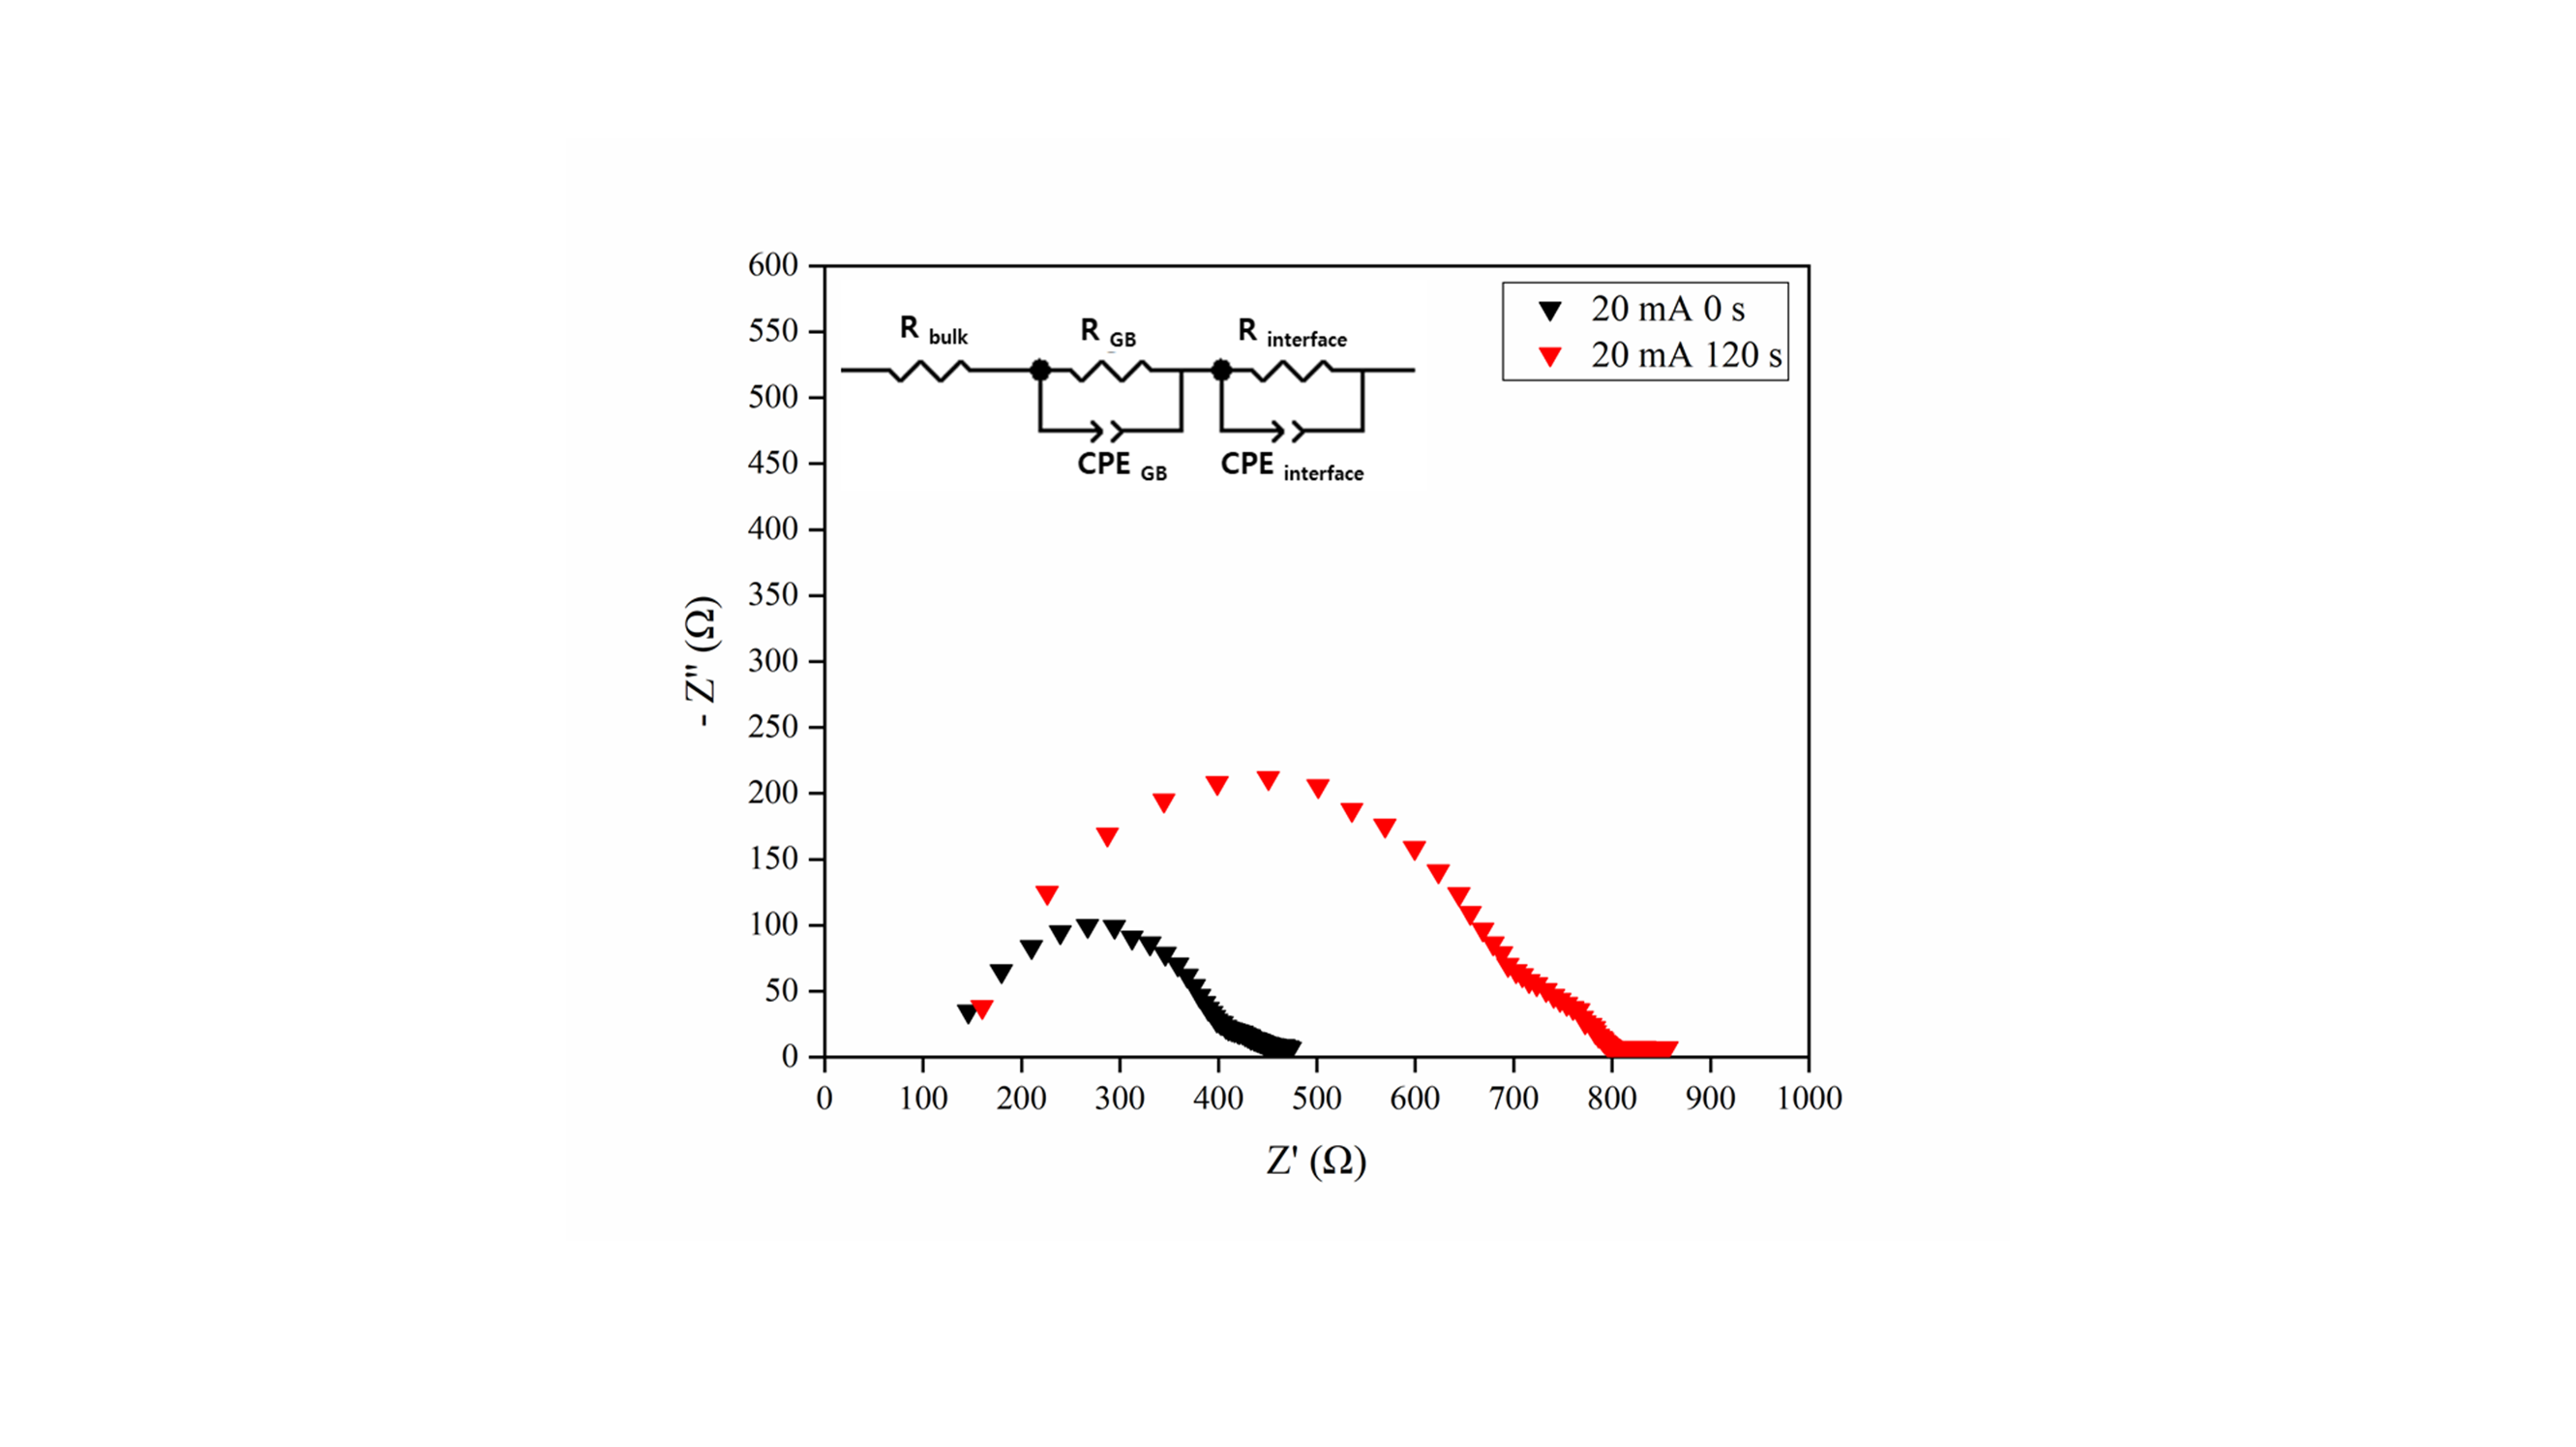
**

**Figure. S13** Nyquist plots of Li | Au | LLZO | Au | Li symmetric cell with Au coating times of 0 and 120 s on a finely prepared Li7La3Zr2O12 pellet surface.

**Table S6.** Fitted parameters corresponding to the Nyquist plots of Au coating times 0, 20, and 120 s on a finely prepared Li7La3Zr2O12 pellet surface.

| **Coating time (s)** | **Rbulk (Ω)** | **RGB (Ω)** |
| --- | --- | --- |
| 0 | 167 | 214.1 |
| 120 | 215.5 | 455.1 |


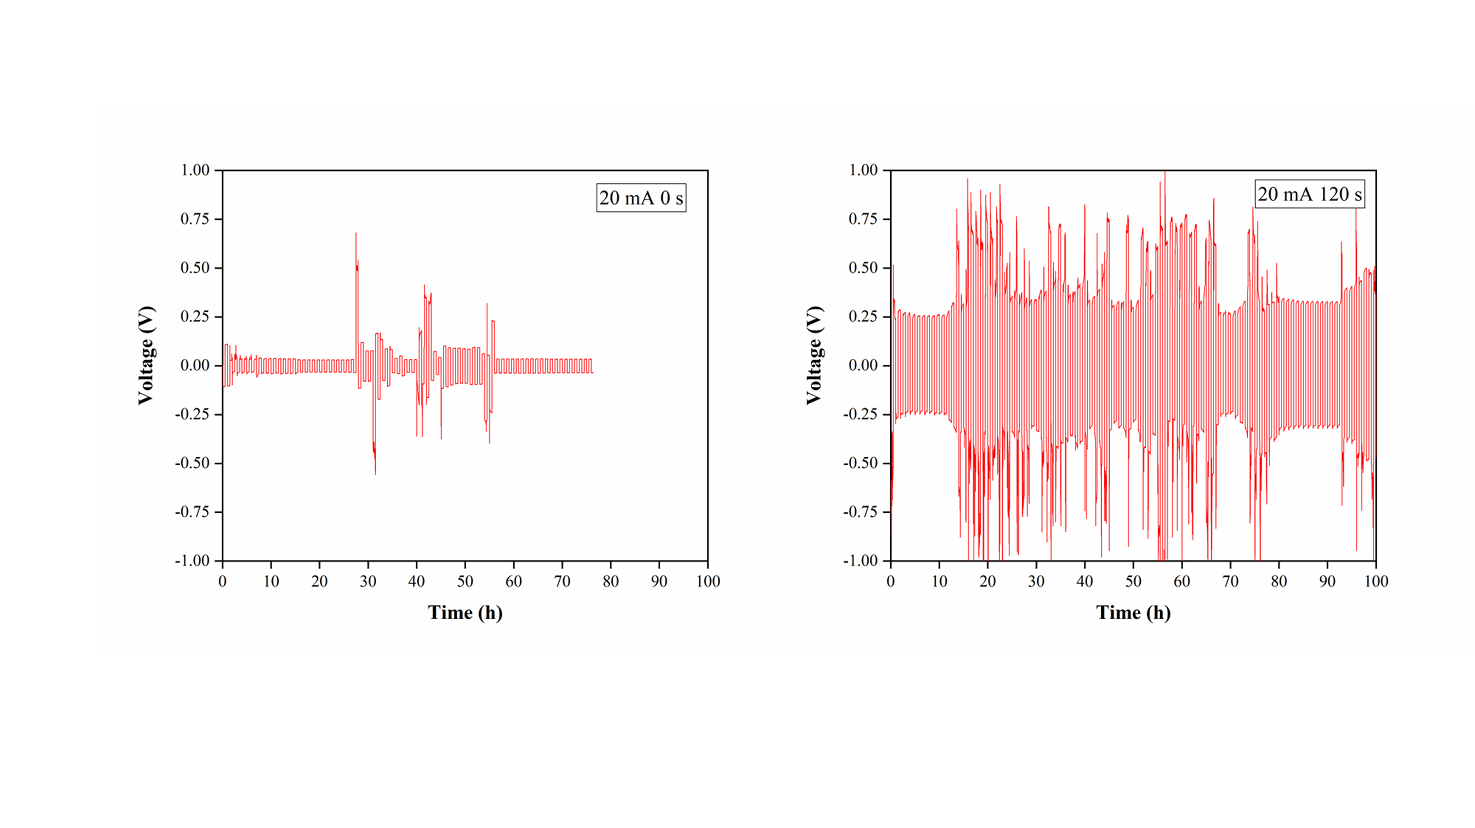


**Figure. S14** Galvanostatic cycling performance of Li | Au | LLZO | Au | Li symmetric cells with different Au coating 0, 120 s on a finely prepared Li7La3Zr2O12 surface at a current density of 0.1 mA cm−2 at room temperature.


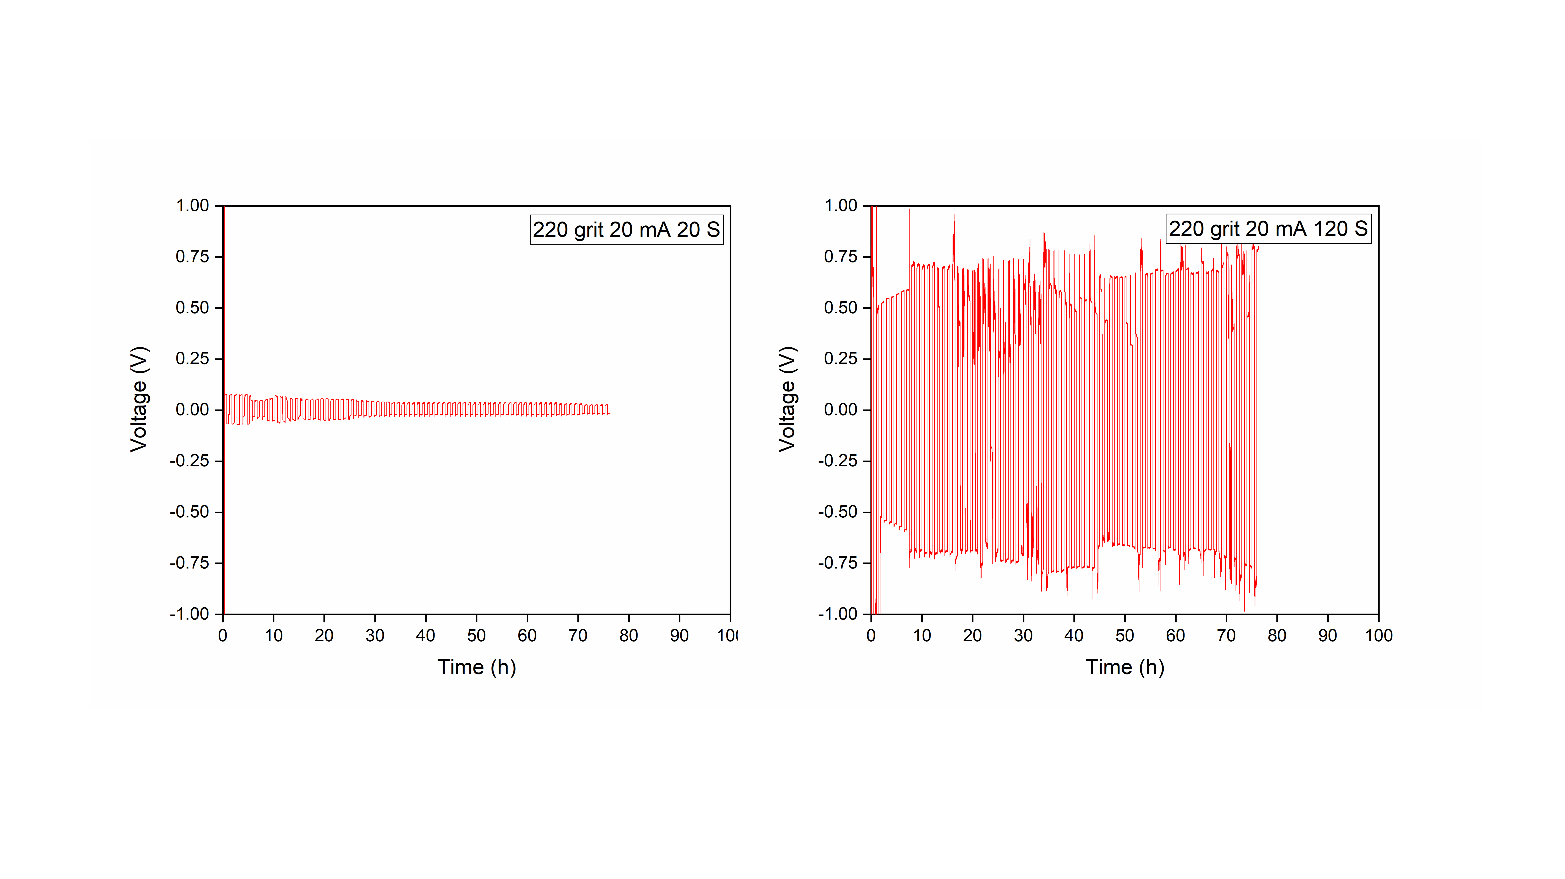


**Figure. S15** Galvanostatic cycling performance of Li | Au | Ga-0.142-LLZO | Au | Li symmetric cells at a current density of 0.1 mA cm−2 at room temperature with different Au coating (20 and 120 s) on the surface of LLZO pellets, which were roughly-polished using 220 grit sandpaper.


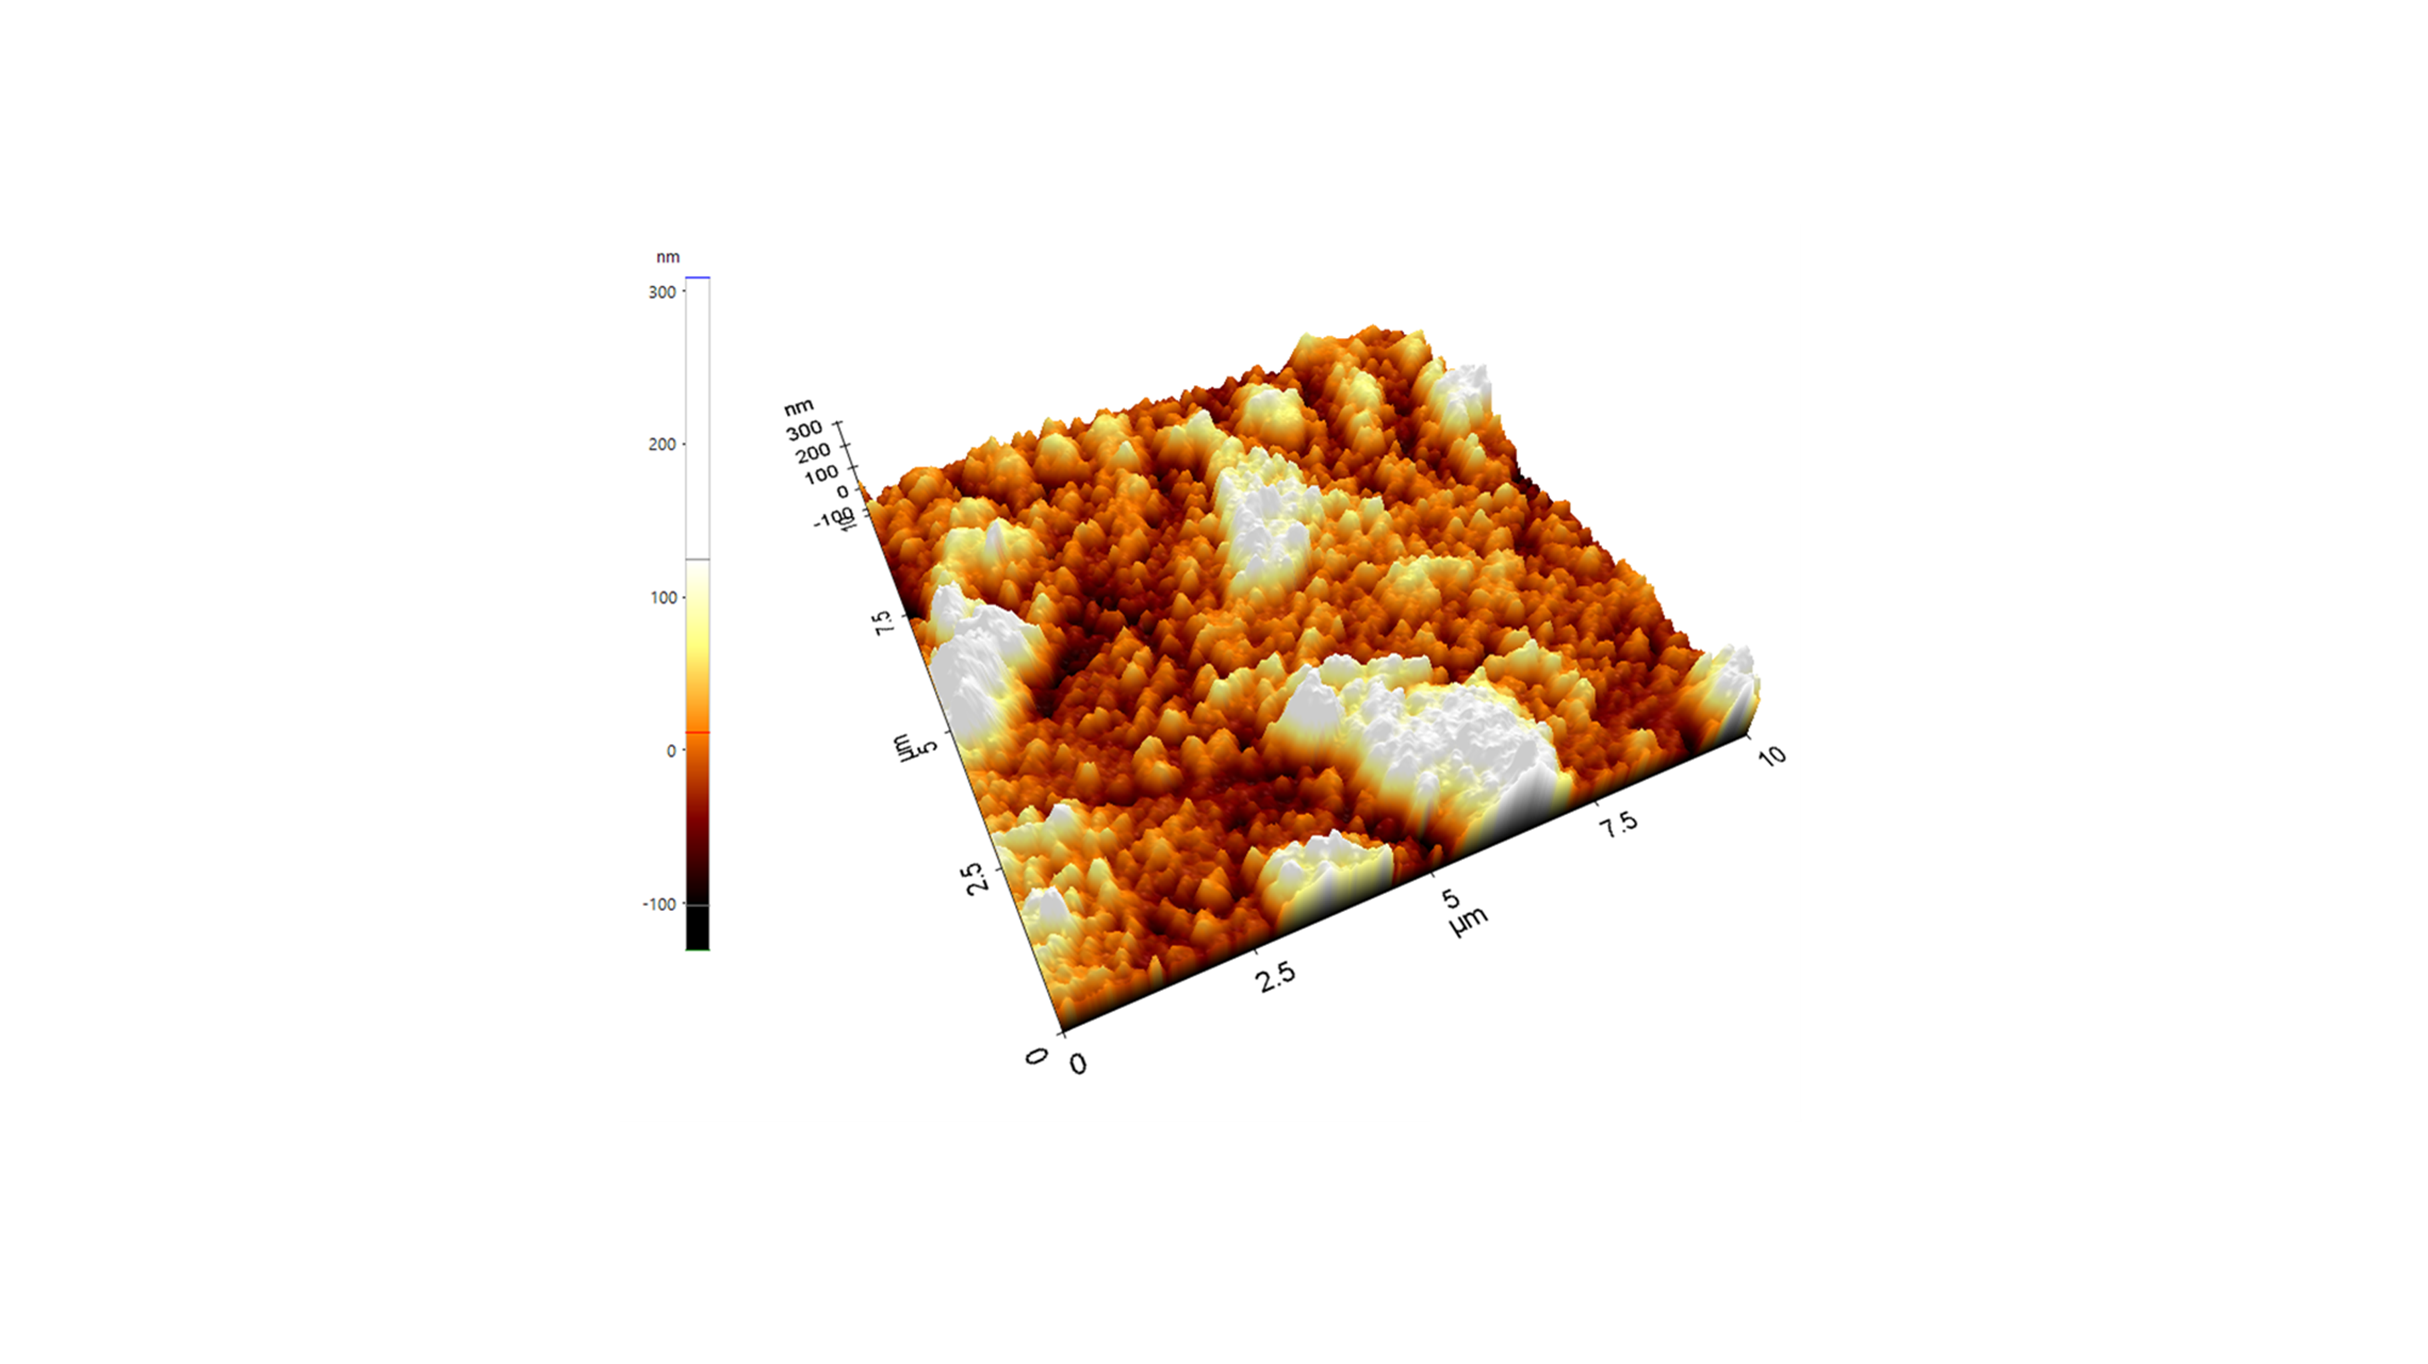


**Figure. S16** AFM image of sintered Li7La3Zr2O12 solid electrolyte with a smooth surface achieved by polishing with 5000 grit sandpaper.
